# Supplementary material for: Nanoporous Double-Gyroid Structure from ABC Triblock Terpolymer Thick Films
Source: Hindawi journal article supplement (doi:10.1155/2023/9598572), 2023-10-10
Supplement: f1 [file 9598572.f1.docx]

Supporting Information

**Nanoporous Double-Gyroid Structure from ABC Triblock Terpolymer Thick Films**

Karim Aissou,1* Maximilien Coronas,1 Daniel Hermida-Merino,3,4 Eduardo Solano,5 Didier Cot,1 Stéphanie Roualdes,1 Denis Bouyer1 and Damien Quemener1

1Institut Européen des Membranes, IEM, UMR 5635, Univ Montpellier, ENSCM, CNRS, Montpellier, France

2Laboratoire de Chimie des Polymères Organiques, Univ. Bordeaux, CNRS, Bordeaux INP, LCPO, UMR 5629, F-33600, Pessac, France

3DUBBLE CRG BM26@ESRF, Netherlands Organization for Scientific Research (NWO), 71 Avenue des Martyrs, 38000 Grenoble, France

4Departamento de Física Aplicada, CINBIO, Universidade de Vigo, Campus
 Lagoas-Marcosende, E36310 Vigo, Galicia, Spain

5NCD-SWEET Beamline, ALBA Synchrotron Light Source, Cerdanyola del Vallès, 08290 Spain

E-mail: [karim.aissou@umontpellier.fr](mailto:karim.aissou@umontpellier.fr)


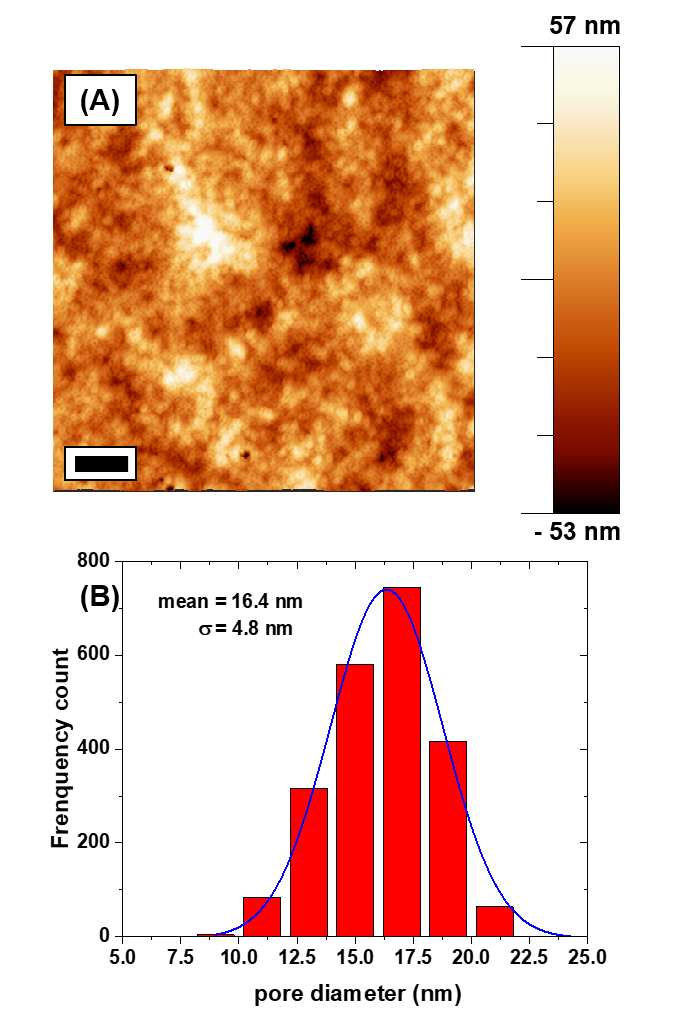


**Figure S1**: (a) (4 x 4 *µ*m) AFM topographic image showing the top surface of a NIPS-made PS-*b*-P2VP-*b*-PEO/PS-*b*-PEO thick film. (b) Distribution of diameter values of (P2VP/PEO) nanodomains extracted from **Figure 2**. A mean diameter value of ~16.4 nm (*σ* ≈ 4.8 nm) was measured. The standard deviation value, *σ*, was obtained by fitting the data with a (blue) Gaussian curve. Scale bar: 500nm.


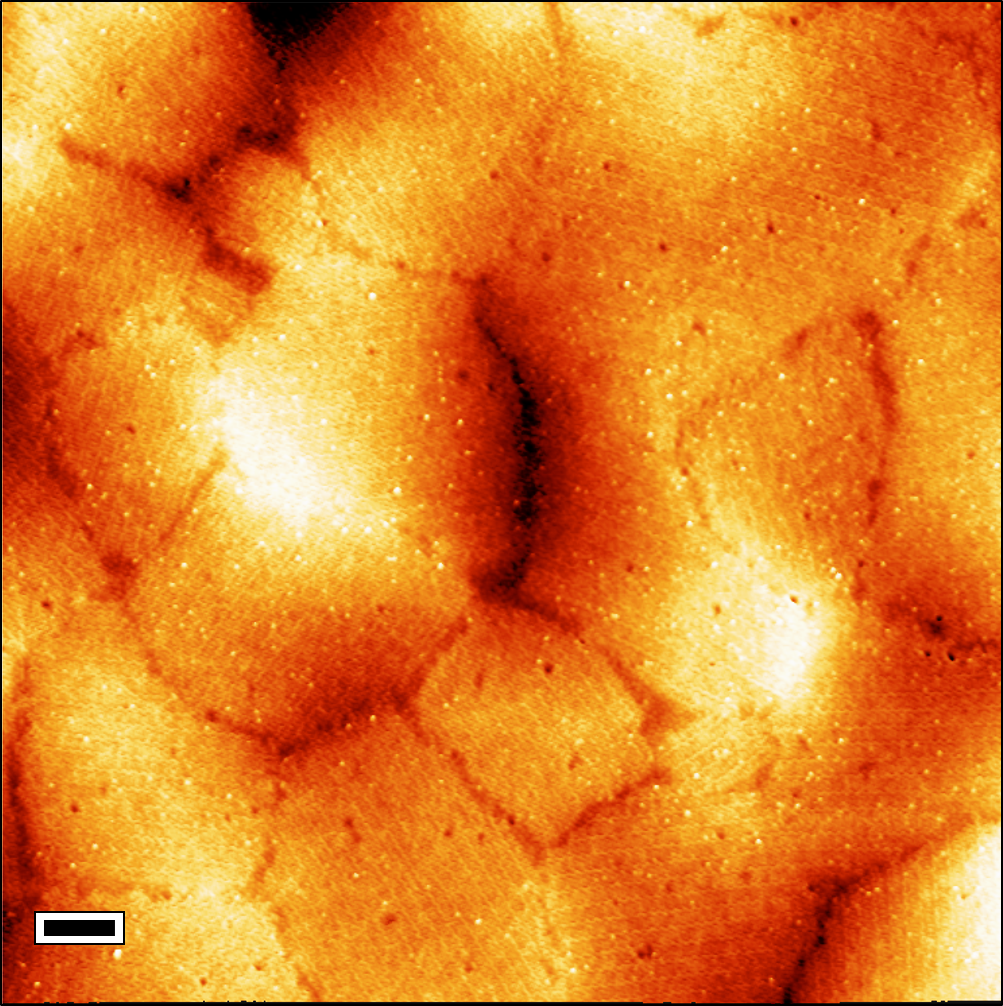


**Figure S2**: AFM topographic image of a solvent-annealed (5h, CHCl3) PS-*b*-P2VP-*b*-PEO/PS-*b*-PEO film showing that the double-wave pattern are formed within large grains of several square micrometers. Scale bars: 500 nm.


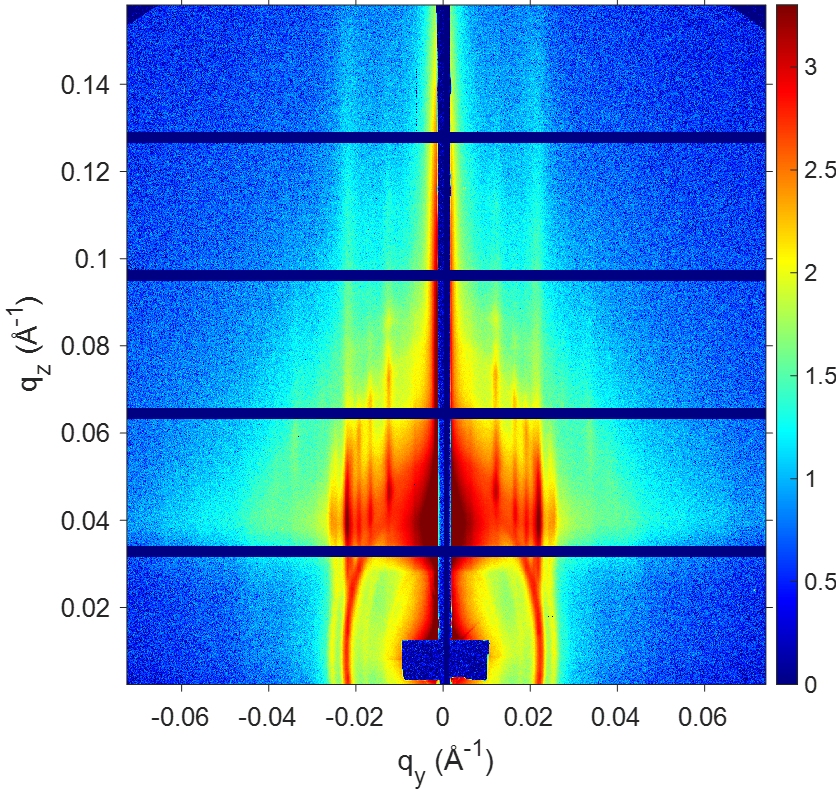


**Figure S3**: 2D GISAXS pattern of a solvent-annealed (5h, CHCl3) PS-*b*-P2VP-*b*-PEO/PS-*b*-PEO film exhibiting several Bragg rod peaks that have relative positions in accordance with a DG structure (aG ~75.8 nm). The incidence angle was set at 0.2°, above the material critical angle, to ensure a full penetration of the X-ray beam in the terpolymer since a such angle allows a penetration depth > 15 µm in a PS-b-P2VP-based film at 12 keV (see ref. [1]).


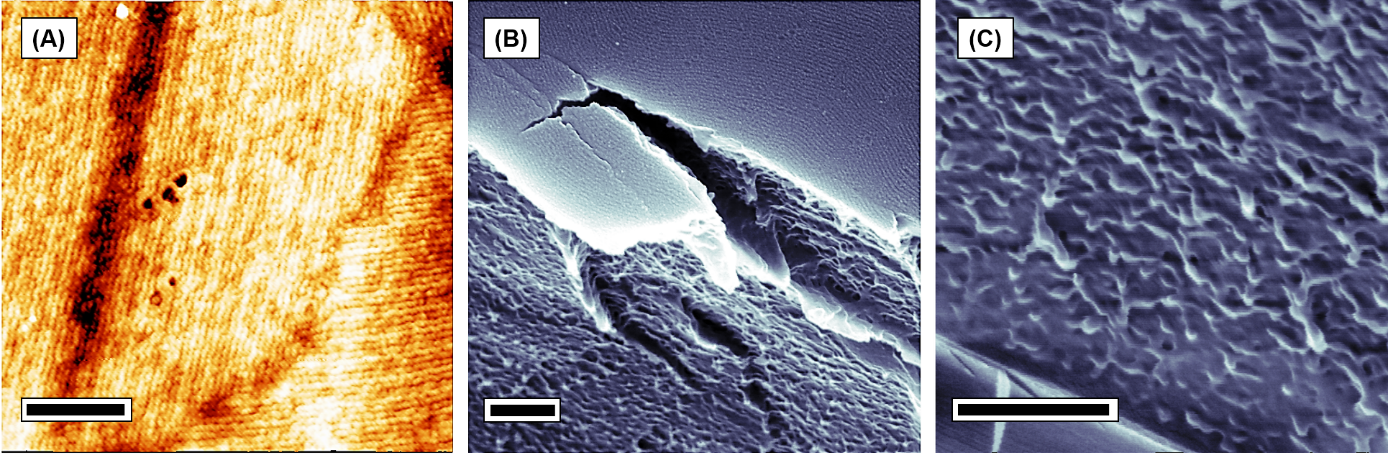


**Figure S4**: (a) AFM topographic and (b) top view SEM images of a solvent-annealed (45 min, CHCl3) PS-*b*-P2VP-*b*-PEO/PS-*b*-PEO film showing that a long-range ordered “wavy line and dot” pattern is produced on the material top surface. The top view SEM image also reveals that the terpolymer film has a sponge-like substructure, which is confirmed by the (c) SEM image taken near the Si substrate. Scale bars: 500 nm.

**
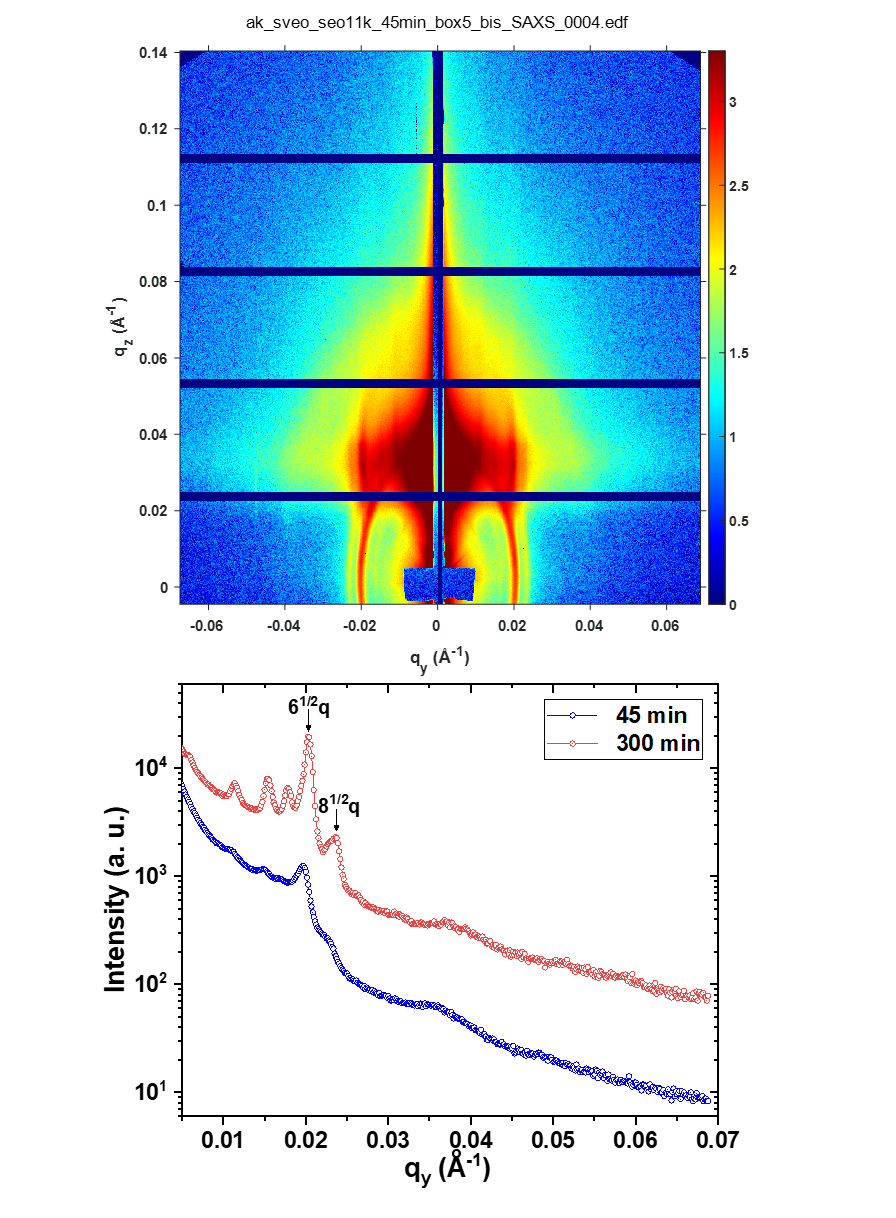
**

**Figure S5**: (top) 2D GISAXS pattern of a solvent-annealed (45 min, CHCl3) PS-*b*-P2VP-*b*-PEO/PS-*b*-PEO film. The incidence angle was set at 0.2°, close to the material critical angle, to ensure a full penetration of the X-ray beam in the terpolymer layer. (bottom) Associated (blue) GISAXS intensity cut along the horizontal *q*y direction (taken around the Yoneda band) exhibiting peaks that overlap those of the gyroid diffraction peaks located at *q*y = 0.113, 0.154, 0.177, 0.202, and 0.234 nm−1. Characteristic peaks of the DG structure located at the relative *q* values of and are also indicated on the (red) Yoneda cut extracted from **Figure S3**.

**Reference:**

[1] Saito, I.; Miyazaki, T.; Yamamoto, K. Depth-Resolved Structure Analysis of Cylindrical Microdomain in Block Copolymer Thin Film by Grazing-Incidence Small-Angle X-ray Scattering Utilizing Low-Energy X-rays. *Macromolecules* **2015**, *48*, 8190– 8196.
